# Supplementary material for: Anti-CD20 Treatment Effectively Attenuates Cortical Pathology in a Rat Model of Widespread Cortical Demyelination
Source: Research Square preprint supplement (doi:10.21203/rs.3.rs-229021/v1), 2021-02-23
Supplement: Supplementary file 1 [file 407ae33d9e07f1975c7ec26f.docx]

**Supplementary table 1: Antibodies used in this work.**

| **Antibody** | **Target** | **Host** | **Dilution** | **Company** | **Catalog number** | **AB ID** |
| --- | --- | --- | --- | --- | --- | --- |
| Isotype control antibody | IgG2ak low endotoxin functional formulation, platinum | mouse | 2 mg/mL | Leinco Technologies | P381 | AB_2831654 |
| Caspase3 | Anti-active Caspase3 antibody | rabbit | 1:500 | Abcam | ab2302 | AB_302962 |
| GFAP | anti-GFAP Ab-6 (Clone ASTRO6) | mouse | 1:100 | Thermo Scientific | MS-1376 | AB_1095984 |
| Iba1 | Anti Iba1 | rabbit | 1:1000 | Wako | 019-19741 | AB_839504 |
| NeuN | Anti-NeuN, clone A60 (KC) | mouse | 1:100 | Millipore | MAB377-KC | AB_2298772 |
| PLP | Anti-myelin proteolipid protein | mouse | 1:500 | AbD Serotec | MCA839G | AB_2237198 |
| anti-rabbit ImmPRESS reagent | anti-rabbit IgG | horse | ready to use | Vector Laboratories | MP-7401 | AB_2336529 |
| anti-mouse ImmPRESS reagent | anti-mouse IgG | horse | ready to use | Vector Laboratories | MP-7422 | AB_2336527 |
| VectaFluor, DyLight 594 | anti-mouse IgG | horse | ready to use | Vector Laboratories | DI-2794 | AB_2336783 |
| VectaFluor, DyLight 488 | anti-rabbit IgG | horse | ready to use | Vector Laboratories | DI-1788 | AB_2336781 |

**Supplementary table 2. Asymptotic significances calculated for the different groups via Mann-Whitney-U test.** P-values < 0.05 were considered to be significant.

| **Compared groups** | | **PLP** | | **Iba1** | | **GFAP** | | **Caspase-3** | | **NeuN** | |
| --- | --- | --- | --- | --- | --- | --- | --- | --- | --- | --- | --- |
| **Ipsi.** | **Contr.** | **Ipsi.** | **Contr.** | **Ipsi.** | **Contr.** | **Ipsi.** | **Contr.** | **Ipsi.** | **Contr.** |
| **C0** | **E1** | 0.198 | 0.230 | 0.317 | 0.391 | 0.647 | 0.200 | 1.000 | 0.721 | 0.156 | 0.063 |
| **C0** | **E2** | 0.172 | 0.181 | 0.174 | 0.220 | 0.163 | 0.092 | 0.401 | 0.746 | 0.606 | 0.366 |
| **C0** | **C1** | 0.020 | 0.014 | 0.011 | 0.011 | 0.014 | 0.014 | 0.011 | 0.011 | 0.019 | 0.010 |
| **C0** | **C2** | 0.032 | 0.019 | 0.020 | 0.020 | 0.053 | 0.053 | 0.020 | 0.020 | 0.020 | 0.020 |
| **E1** | **E2** | 0.195 | 0.106 | 0.416 | 0.817 | 0.517 | 0.746 | 0.524 | 0.772 | 0.074 | 0.083 |
| **E1** | **C1** | 0.392 | 0.088 | 0.008 | 0.008 | 0.011 | 0.010 | 0.008 | 0.008 | 0.011 | 0.008 |
| **E1** | **C2** | 0.300 | 0.039 | 0.016 | 0.017 | 0.046 | 0.044 | 0.017 | 0.017 | 0.014 | 0.017 |
| **E2** | **C1** | 0.007 | 0.014 | 0.006 | 0.007 | 0.006 | 0.007 | 0.007 | 0.006 | 0.062 | 0.007 |
| **E2** | **C2** | 0.014 | 0.014 | 0.014 | 0.014 | 0.036 | 0.037 | 0.014 | 0.014 | 0.014 | 0.014 |
| **C1** | **C2** | 1.000 | 0.724 | 0.724 | 0.372 | 1.000 | 0.064 | 1.000 | 0.724 | 0.157 | 0.724 |
